# Supplementary material for: Ral GTPase–activating protein regulates the malignancy of pancreatic ductal adenocarcinoma
Source: PubMed Central journal article supplement — Cancer Sci. 2021 Jun 15;112(8):3064–73. doi: 10.1111/cas.14970 (PMC8353909; doi:10.1111/cas.14970), 2021-06-15

# Supplementary Table 1.

## Primer sequences used for real-time quantitative PCR (RT-qPCR)

| Primer name                       | Sequence                                      | Notes   |                                |
|-----------------------------------|-----------------------------------------------|---------|--------------------------------|
| <b>RalGAP<math>\alpha</math>1</b> | 5'-CTCCTACCCAGAGATTCTACCCA-3' (forward)       | RT-qPCR |                                |
|                                   | 5'-CATGTTATGGCAGACACATGAAGGC-3' (reverse)     |         |                                |
| <b>RalGAP<math>\alpha</math>2</b> | 5'-AGAACGTTTCATCTTCAGGCTCT-3' (forward)       |         |                                |
|                                   | 5'-AGGGTTGAGTTATTTGCTGCCTA-3' (reverse)       |         |                                |
| <b>RalGAP<math>\beta</math></b>   | 5'-CTCAGTTAAACACGTGCATTGGT-3' (forward)       |         |                                |
|                                   | 5'-CAACTGAGTAGAAGGCTGTGACT-3' (reverse)       |         |                                |
| <b>RalGDS</b>                     | 5'-GAGATGAACCCCAAGAGAG-3' (forward)           |         |                                |
|                                   | 5'-CTTCTTGGTCTGAGGGTGT-3' (reverse)           |         |                                |
| <b>RGL1</b>                       | 5'-CAAGCCCAAACGTGAAGAA-3' (forward)           |         |                                |
|                                   | 5'-AGCACGTGAATTCTGCTGAC-3' (reverse)          |         |                                |
| <b>RGL2</b>                       | 5'-TTCAGTTTATGCCGTGGTGT-3' (forward)          |         |                                |
|                                   | 5'-CCACGACATTCATTCTGGAG-3' (reverse)          |         |                                |
| <b>RGL3</b>                       | 5'-CCTGCAATCTAACCCCATCT-3' (forward)          |         |                                |
|                                   | 5'-ATCTCCCACTCCTCCTCCT-3' (reverse)           |         |                                |
| <b>RALGPS1</b>                    | 5'-AGGGGCCTCTGAGAAGAAAA-3' (forward)          |         |                                |
|                                   | 5'-GAAATCGGGAACCAGTCTGA-3' (reverse)          |         |                                |
| <b>RALGPS2</b>                    | 5'-TTGTGTGGGACACAGCTTTT-3' (forward)          |         |                                |
|                                   | 5'-AGGCTGCACTCAAATGCTTA-3' (reverse)          |         |                                |
| <b>GAPDH</b>                      | 5'-GAAGGTGAAGGTCGGAGTC-3' (forward)           |         |                                |
|                                   | 5'-GAAGATGGTGATGGGATTC-3' (reverse)           |         |                                |
| <b>HRAS</b>                       | 5'-GCAGTCGCGCCTGTGAACGGTG-3' (forward)        |         | PCR for RAS mutation detection |
|                                   | 5'-AATTTACTGTGATCCCATCTGTGCCCGAC-3' (reverse) |         |                                |
| <b>KRAS</b>                       | 5'-GCCATTTCCGACTGGGAGCGAG-3' (forward)        |         |                                |
|                                   | 5'-AACTCTGGGAATACTGGCACTTAGAGGA-3' (reverse)  |         |                                |
| <b>NRAS</b>                       | 5'-TCCCGGCTGTGGTCTAAATCTGTC-3' (forward)      |         |                                |
|                                   | 5'-GGAAGTCAGGACCAGGGTGTGAGT-3' (reverse)      |         |                                |

## Supplementary Table 2.

### Antibodies for immunoblotting and immunoprecipitation

| Antibody                                               | M.W.<br>(kDa) | Host   | polyclonal<br>/monoclonal | Company                                                 | Catalogue<br>number |
|--------------------------------------------------------|---------------|--------|---------------------------|---------------------------------------------------------|---------------------|
| RalA                                                   | 28            | Mouse  | monoclonal                | BD Transduction Laboratories<br>(San Jose, CA, USA)     | 610222              |
| RalB                                                   | 26            | Rabbit | polyclonal                | Cell Signaling<br>(Danvers, MA, USA)                    | 3523S               |
| Ras                                                    | 21            | Mouse  | monoclonal                | Millipore<br>(Burlington, MA, USA)                      | 05-516              |
| RhoA                                                   | 21            | Rabbit | polyclonal                | Santa Cruz Biotechnology, Inc.<br>(Dallas, TX, USA)     | sc-179              |
| Rac1                                                   | 21            | Mouse  | monoclonal                | Millipore<br>(Burlington, MA, USA)                      | 05-389              |
| cdc42                                                  | 22            | Mouse  | monoclonal                | BD Transduction Laboratories<br>(San Jose, CA, USA)     | 610928              |
| GAPDH                                                  | 38            | Mouse  | monoclonal                | Wako Pure Chemical Industries, Ltd.<br>(Osaka, Japan)   | 015-25473           |
| RalGAP $\alpha$ 1                                      | 260/<br>240   | Rabbit | polyclonal                | Made by ourselves previously<br>(Shirakawa et al. 2009) | /                   |
| RalGAP $\alpha$ 2                                      | 220           | Rabbit | polyclonal                | Made by ourselves previously<br>(Shirakawa et al. 2009) | /                   |
| RalGAP $\beta$                                         | 170           | Rabbit | polyclonal                | Made by ourselves previously<br>(Shirakawa et al. 2009) | /                   |
| Horseradish peroxidase-conjugated goat anti-mouse IgG  | /             | Goat   | polyclonal                | Jackson ImmunoResearch<br>(West Grove, PA, USA)         | 115-035-003         |
| Horseradish peroxidase-conjugated goat anti-rabbit IgG | /             | Goat   | polyclonal                | Jackson ImmunoResearch<br>(West Grove, PA, USA)         | 111-035-144         |
| Easy blot anti-rabbit IgG                              | /             | Goat   | polyclonal                | Genetex<br>(Irvine, CA, USA)                            | GTX221666-01        |
| Vimentin                                               | 57            | Rabbit | monoclonal                | Cell Signaling<br>(Danvers, MA, USA)                    | 5741                |
| E-cadherin                                             | 135           | Rabbit | monoclonal                | Cell Signaling<br>(Danvers, MA, USA)                    | 3195                |

(M.W., molecular weight)

### Supplementary Table 3.

DNA oligo sequences for guide RNA cloning, and primer sequence for knock-out screening.

| <b>Gene</b>                     | <b>20-nucleotide guide sequene<br/>(5' to 3')</b> | <b>Genomic PCR primers and<br/>sequencing primer (5' to 3')</b> |
|---------------------------------|---------------------------------------------------|-----------------------------------------------------------------|
| <b>RaIGAP<math>\beta</math></b> | ACCTCTCGTCCAACGCTCTC                              | Forward:<br>AGAGGCAAGATGTTTGCAGC                                |
|                                 |                                                   | Reverse:<br>TCCAGAGGTAGGGATGAGGC                                |

# Supplementary Figure 1

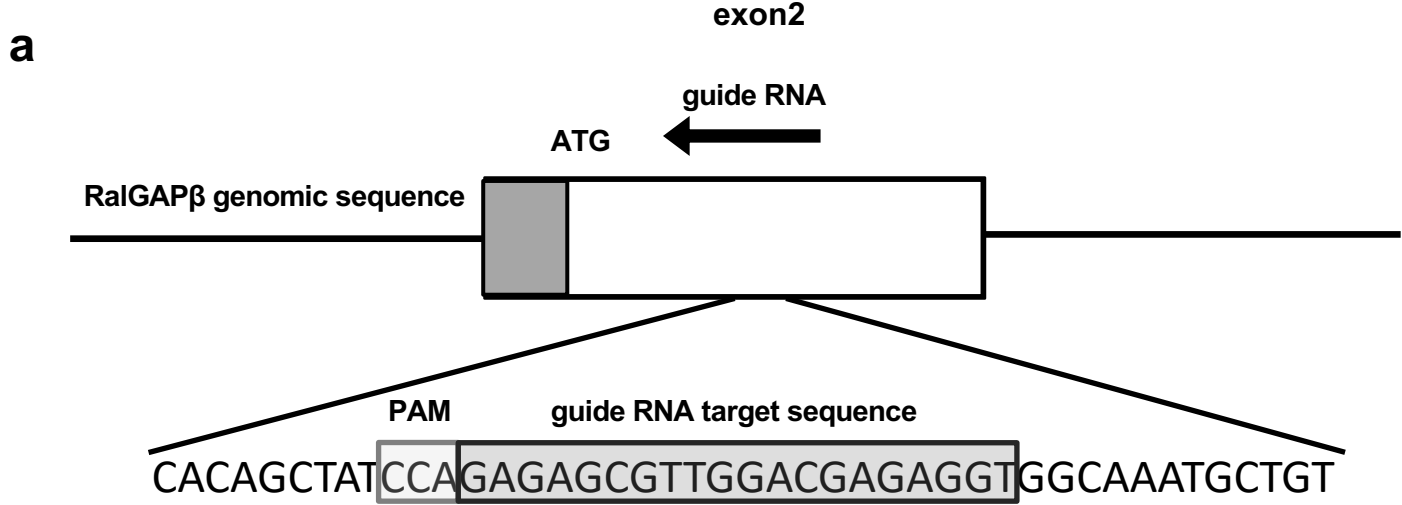

**b**

<PANC-1 RaIGAP $\beta$  KO>

| No | Allele1         | Allele2          |
|----|-----------------|------------------|
| 1  | 2 base deletion | 1 base insertion |
| 2  | 4 base deletion | 1 base insertion |
| 3  | 2 base deletion | 1 base deletion  |

<MIA PaCa-2 RaIGAP $\beta$  KO>

| No | Allele1          | Allele2          |
|----|------------------|------------------|
| 1  | 1 base insertion | 1 base insertion |
| 2  | 1 base deletion  | 1 base insertion |
| 3  | 2 base insertion | 2 base insertion |

# Supplementary Figure 2

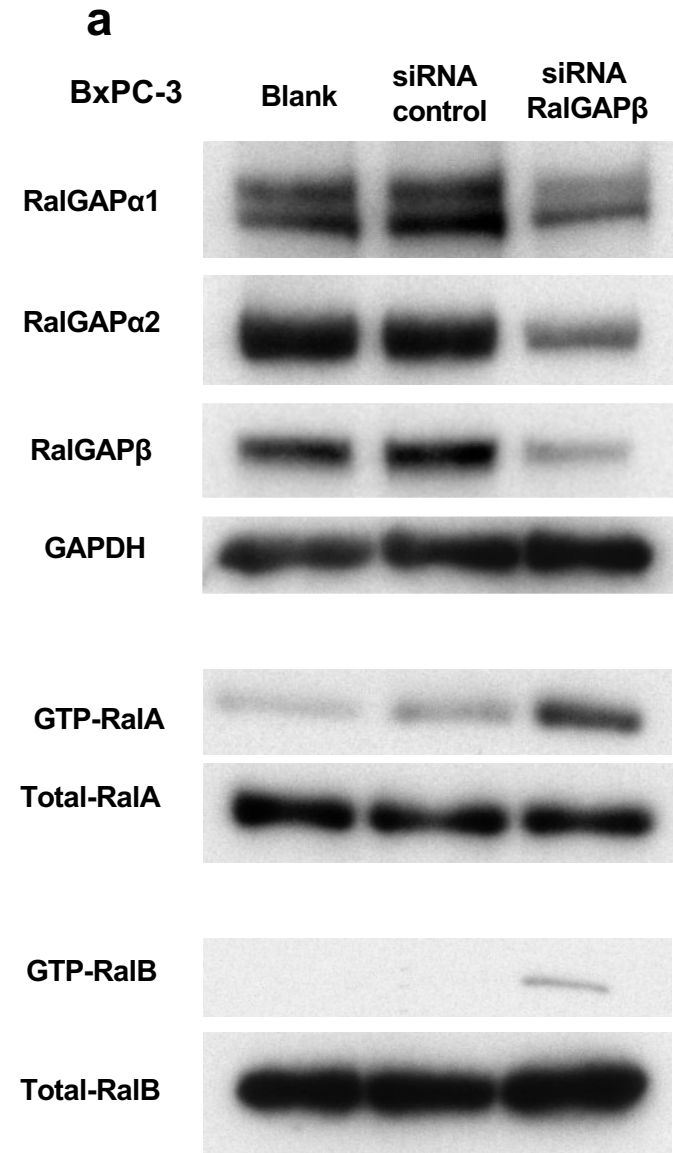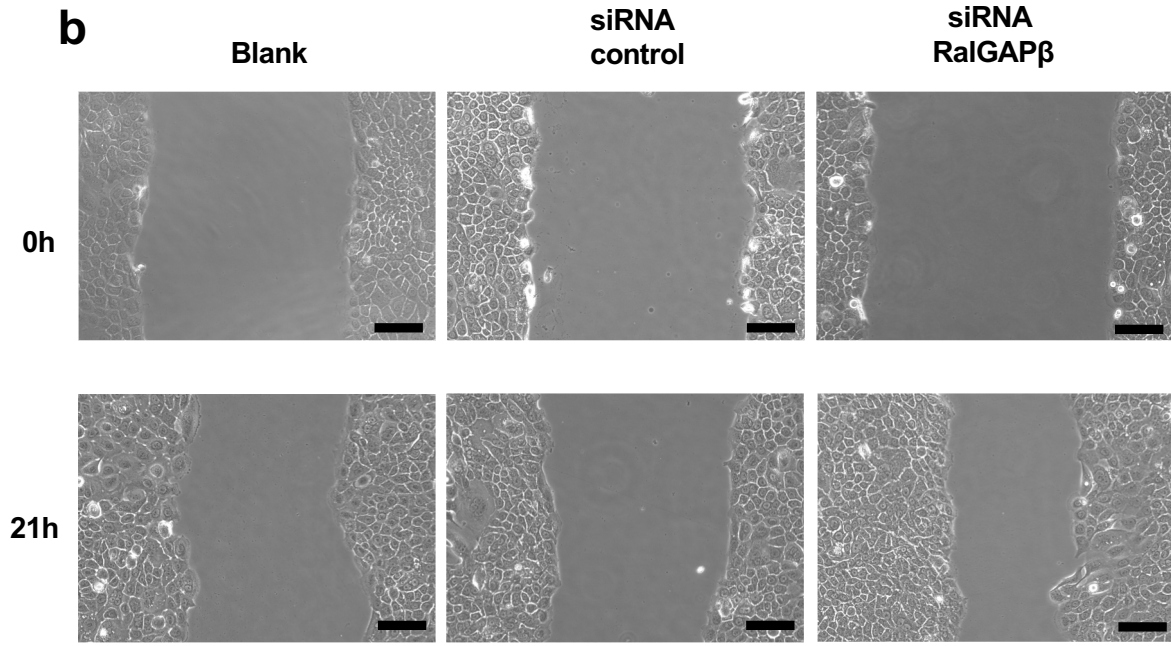

**c**

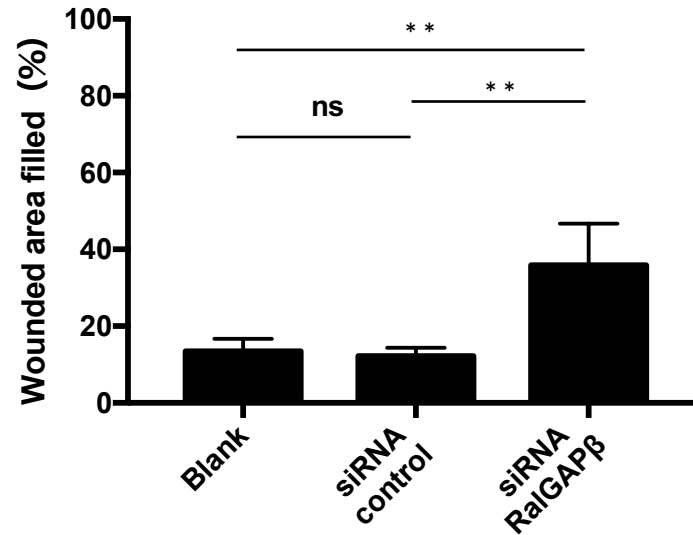



# The cancer genome atlas (TCGA) mRNA expression level of RalGAP $\alpha$ 1 in pancreatic cancer

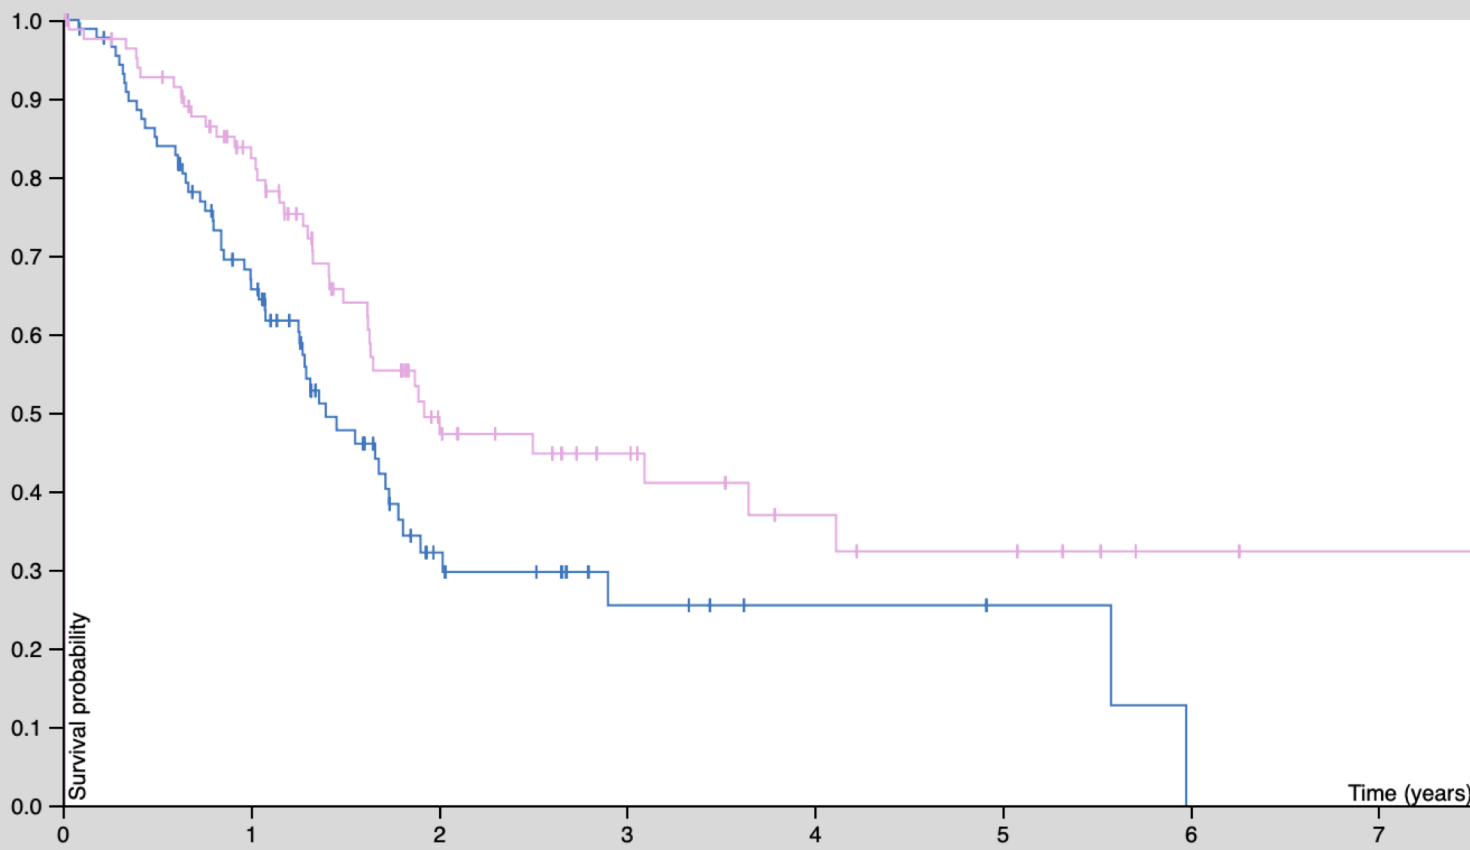

■ Low expression (n=91)  
■ High expression (n=85)

| Survival analysis                      |       |
|----------------------------------------|-------|
| Current cut off <sup>i</sup> :         | 1.21  |
| Best expression cut off <sup>i</sup> : | 1.21  |
| Median expression <sup>i</sup> :       | 1.19  |
| Median follow up time <sup>i</sup> :   | 1.27  |
| P score <sup>i</sup> :                 | 0.012 |
| 5-year survival high <sup>i</sup> :    | 32%   |
| 5-year survival low <sup>i</sup> :     | 25%   |

# The cancer genome atlas (TCGA) mRNA expression level of RalGAP $\alpha$ 2 in pancreatic cancer

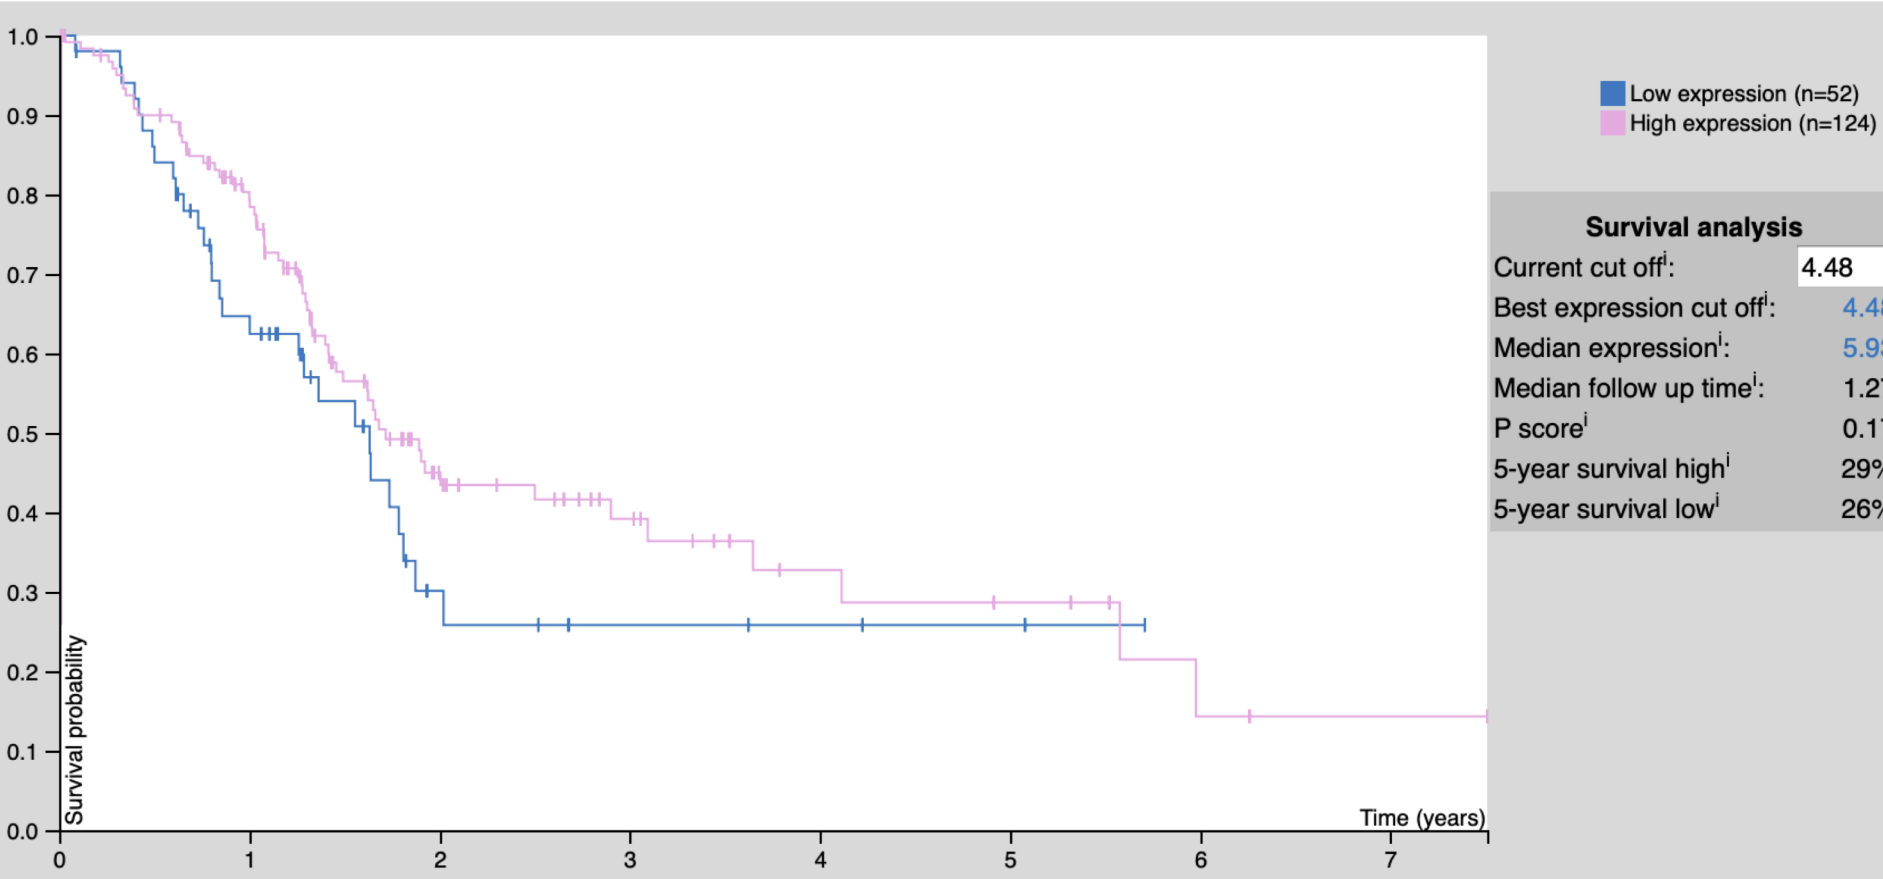



# The cancer genome atlas (TCGA) mRNA expression level of RalGAP $\beta$ in pancreatic cancer

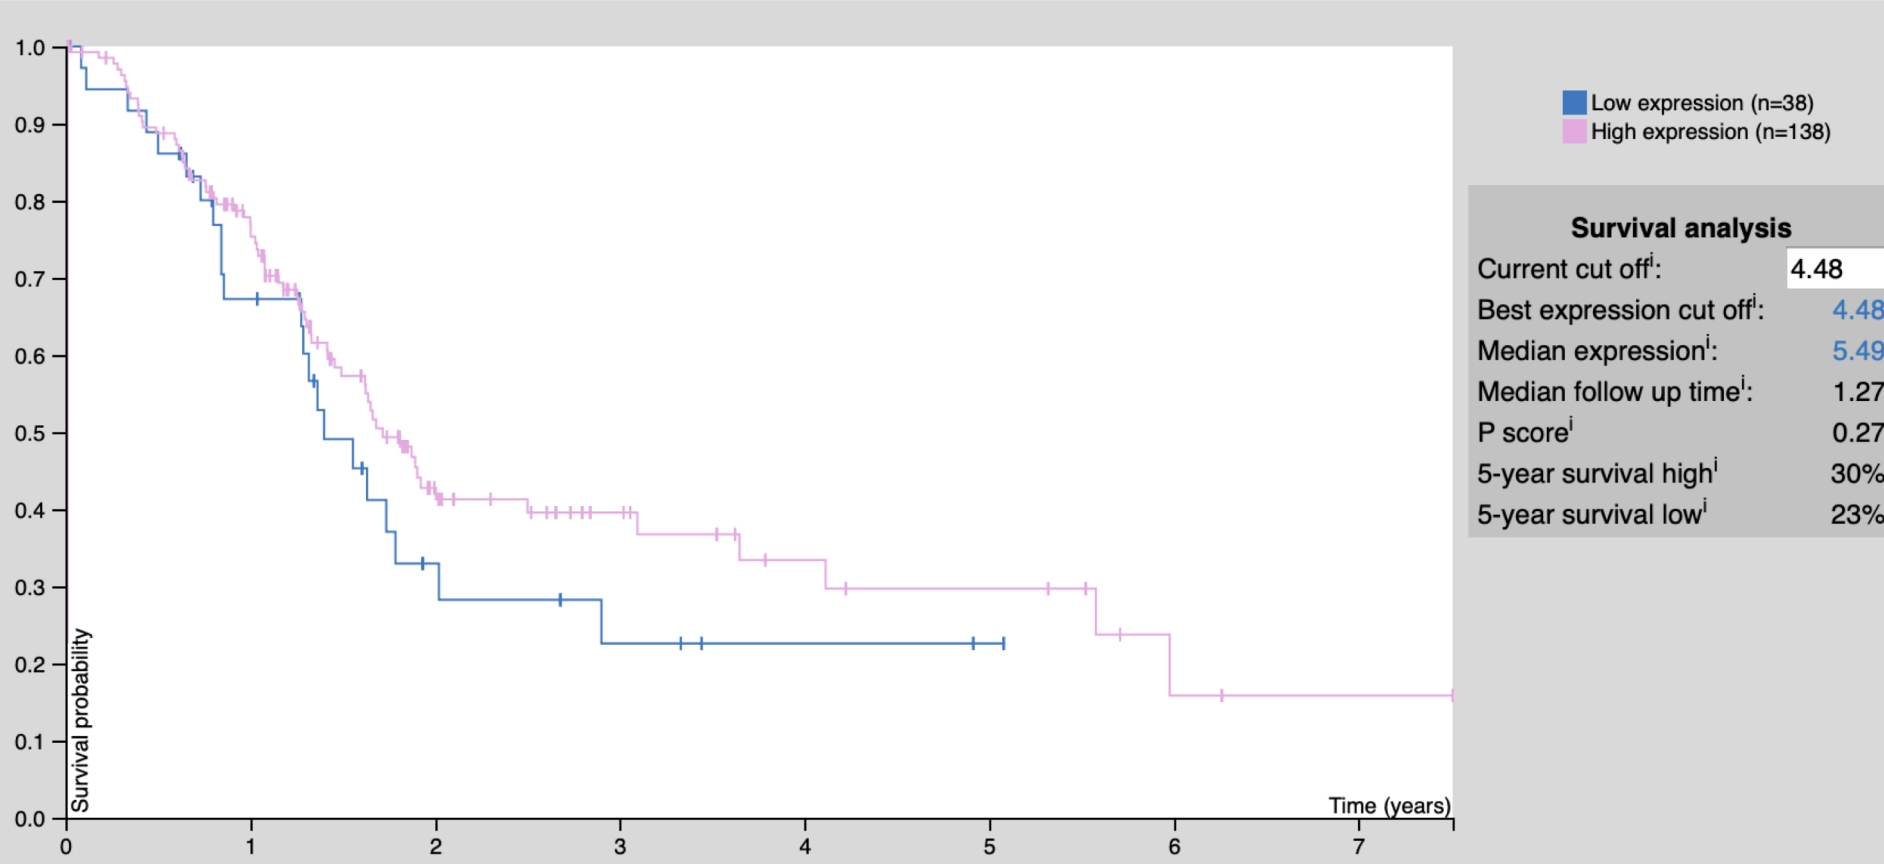

Supplement: CAS-112-3064-s002.pdf [file CAS-112-3064-s002.pdf]
